# Limits to adaptation in partially selfing species

Matthew Hartfield<sup>1,2,3,\*</sup> and Sylvain Glémin<sup>4,5</sup>

<sup>1</sup> Laboratoire MIVEGEC (UMR CNRS 5290, IRD 224, UM1, UM2), 911 avenue Agropolis, B.P. 64501, 34394 Montpellier cedex 5, France.

<sup>2</sup> Department of Ecology and Evolutionary Biology, University of Toronto, Ontario, Canada.

<sup>3</sup> Bioinformatics Research Centre, University of Aarhus, 8000C Aarhus, Denmark.

<sup>4</sup> Institut des Sciences de l'Evolution de Montpellier, UMR 5554 CNRS, Place Eugène Bataillon, 34095 Montpellier cedex 5, France.

<sup>5</sup> Department of Ecology and Genetics, Evolutionary Biology Centre, Uppsala University, SE-752 36 Uppsala, Sweden.

\* *Corresponding author:* matthew.hartfield@utoronto.ca

*Running Head:* Adaptation limits in partial selfers

*Key words:* Adaptation, selection interference, dominance, mating system evolution, recombination, selfing.

## Abstract

Single locus theory indicates that selfing species are more able than outcrossing ones to fix emerging recessive beneficial mutations, as they are not masked as heterozygotes. However, partially selfing organisms suffer from relaxed recombination, which reduces overall selection efficiency. Although the effect of linked deleterious alleles on adaptation has previously been studied, the extent to which multiple adaptations interfere in partially selfing organisms is currently unknown. We derive branching-process models to quantify the extent that emergence of a second beneficial allele is obstructed by an existing selective sweep. We consider both the potential loss of the second beneficial mutation if it has a weaker advantage than the first sweep (the ‘stochastic interference effect’), and also the potential replacement of the first sweep if the second mutant is fitter (‘replacement effect’). Overall, the stochastic interference effect has a larger impact on preventing fixation of both adaptive alleles in highly selfing organisms, but the replacement effect can be stronger with multiple mutations. Interference has two opposing effects on Haldane’s Sieve. First, recessive mutants are disproportionately likely to be lost, so it is more likely that only dominant mutations will emerge in outcrossers. Second, with frequent rates of adaptive evolution, outcrossing organisms are more able to fix weak beneficial mutations of any dominance value, contrary to the predictions of Haldane’s Sieve. Our analysis shows that even under low rates of adaptive mutation, interference can be sufficiently strong to greatly limit adaptation in selfing organisms.

## 24 Introduction

Self-fertilisation - reproduction where both gametes arise from the same parent - has been one of the most frequently-observed transitions in nature. Self-fertilising species are widespread in angiosperms (IGIC and KOHN 2006), some animals (JARNE and AULD 2006) and fungi (BILLIARD *et al.* 2011; GIOTI *et al.* 2012). Selfing has immediate benefits, such as up to a two-fold transmission advantage (FISHER 1941) and reproductive assurance under mate limitation (BAKER 1955, 1967).

Hence self-fertilisation should be able to rapidly evolve, unless countered by high levels of inbreeding depression (LANDE and SCHEMSKE 1985). However, empirical studies usually find that selfing lineages are a ‘dead end’, since back-transitions to outcrossing are rare, and high extinction rates have been inferred from comparative studies of related selfing-outcrossing taxa (IGIC *et al.* 2008; GOLDBERG *et al.* 2010; WRIGHT and BARRETT 2010; WRIGHT *et al.* 2013). In addition, plenty of species display mixed-mating systems and even highly selfing species still outcross at a low rate, implying that even if selfing is beneficial overall, some outcrossing is desirable (SCHEMSKE and LANDE 1985; GOODWILLIE *et al.* 2005). Self-fertilisation is posited to be detrimental in the long-term since the effective population size  $N_e$  is reduced at least by a factor  $1/(1 + F)$ , for  $F$  the inbreeding coefficient (POLLAK 1987; CHARLESWORTH 1992; CABALLERO and HILL 1992). Furthermore, recombination is reduced by a factor  $1 - F$  (GOLDING and STROBECK 1980; NORDBORG 2000). This joint reduction in both diversity and recombination can lead to a decrease in the efficacy of selection, so deleterious mutations accumulate more rapidly in selfing organisms, leading to population

48 extinction (HELLER and MAYNARD SMITH 1978; LYNCH *et al.* 1995).

Whether this mechanism is a major cause of extinction of self-fertilising species  
 50 is still under debate (reviewed in GLÉMIN and GALTIER (2012); IGIC and BUSCH  
 (2013)). Some sister-species comparisons of selfing-outcrossing taxa reveal evi-  
 52 dence of increased mutation accumulation in selfers, as demonstrated with either  
 increased nonsynonymous-to-synonymous polymorphism ratio ( $\pi_n/\pi_s$ ) or weaker  
 54 codon usage bias. Conversely, analyses of divergence rates generally do not show  
 evidence for relaxed selection. Part of the reason for this lack of evidence could  
 56 arise due to the recent transitions to selfing in most of these species, as explicitly  
 demonstrated in *Capsella rubella* by BRANDVAIN *et al.* (2013), leaving little time  
 58 for mutation accumulation to act.

Less investigated is the idea that selfing reduces the ability for a species to  
 60 adapt, especially in a new environment, though it was the one initially formulated  
 by STEBBINS (1957). For adaptation at a single locus, selfing organisms are more  
 62 likely than outcrossers to fix new recessive adaptive mutations (HALDANE 1927;  
 CHARLESWORTH 1992) but are generally less efficient in adapting from stand-  
 64 ing variation (GLÉMIN and RONFORT 2013). Yet the effect of adaptation across  
 multiple sites in partially selfing organisms has received much less attention. Of  
 66 particular interest is how the reduction in recombination in highly selfing organ-  
 isms impedes the overall rate of adaptation. A well-established phenomenon in  
 68 low-recombining genomes is the ‘Hill-Robertson effect’, where selection at linked  
 loci reduces the efficacy of selection acting on a specific mutation (HILL and  
 70 ROBERTSON 1966; CHARLESWORTH *et al.* 2009). Outcrossing can therefore break  
 down these effects and unite beneficial mutations from different individuals into  
 72 the same genome, greatly increasing the rate of adaptation (FISHER 1930; MULLER

1932; FELSENSTEIN 1974; OTTO and FELDMAN 1997).

74 Historically, the effect of advantageous mutations on mating-system evolution  
has been neglected since most observable spontaneous mutations are deleterious in  
76 partial selfers (SLOTTE 2014). Analysis using divergence data from the *Arabidopsis*  
genome shows low number of genes acting under adaptive selection (BARRIER  
78 *et al.* 2003; CLARK *et al.* 2007; SLOTTE *et al.* 2010, 2011), and only  $\sim 1\%$  of  
genes with signatures of positive selection in *Medicago truncatula* (PAAPE *et al.*  
80 2013). These analyses reflect broader findings that the proportion of adaptive  
substitutions in the coding regions of selfing plants are not significantly different  
82 from zero (GOSSMANN *et al.* 2010; HOUGH *et al.* 2013). However, widespread local  
adaptation to climate in *Arabidopsis* is observed (FOURNIER-LEVEL *et al.* 2011;  
84 HANCOCK *et al.* 2011; ÅGREN *et al.* 2013), which is expected to leave a weaker  
signature on the genome (SLOTTE 2014), and the power to detect local selection  
86 can also increase once demography is accounted for (HUBER *et al.* 2014).

Finally, both outcrossing and selfing domesticated plant and crop species can  
88 also be used to demonstrate recent adaptation. RONFORT and GLÉMIN (2013)  
showed how adaptive traits obtained from quantitative trait loci, tended to be  
90 dominant in outcrossers and recessive in selfers, in line with ‘Haldane’s sieve’.  
Hence while beneficial mutations may not be as frequent as deleterious alleles,  
92 it is clear that they arise often enough to impact on evolution of self-fertilising  
species. Furthermore, due to the reduced recombination rate in selfers, adaptive  
94 alleles should interfere with a greater region of the genome than in outcrossing  
organisms.

96 Recently, HARTFIELD and GLÉMIN (2014) investigated the effect of a linked  
deleterious mutation on a selective sweep, and demonstrated how beneficial alleles

needed to be more recessive than  $1/2$  in order for selfing to be beneficial over obligate outcrossing. This model showed a clear example of how breaking apart selection interference at linked sites provided greater benefits to outcrossing and mixed-mating systems over complete self-fertilisation. A multi-locus simulation study by KAMRAN-DISFANI and AGRAWAL (2014) verified that background selection impedes genome-wide adaptation rates in selfing organisms, but these costs generally do not completely nullify the transmission advantage of selfing unless pollen discounting is high, or beneficial mutations are strong and frequent. These studies clearly showed how linkage to deleterious mutations can limit adaptation in selfers, however it remains an open question as to what extent multiple beneficial mutations interfere in highly selfing species.

This article will extend previous analyses to consider how linkage between several beneficial mutations at linked sites affects their emergence in partially selfing species. Classic two-locus analytical models of the Hill-Robertson effect are altered to take dominance and selfing into account, then examined to quantify how adaptation is limited in partially selfing organisms. We also discuss a heuristic extension of the model of WEISSMAN and BARTON (2012) to determine the effect of mating system when many sweeps are present.

## Outline of the problem

### General modelling approach

The goal of this paper is to determine how the effect of existing beneficial mutations at linked loci impedes the emergence of novel adaptive alleles in partially

120 selfing organisms. We will mostly consider two locus models to ensure tractability.

At a first locus, consider a beneficial mutation with selective coefficient  $s_1$ , so the  
 122 fitness of individuals carrying it is  $1 + h_1 s_1$  in heterozygote form, and  $1 + s_1$  in  
 homozygote form. Similarly at the second locus, the fitness of individuals carrying  
 124 the beneficial mutation is  $1 + h_2 s_2$  in heterozygotes and  $1 + s_2$  in homozygotes.  
 We denote the four haplotypes 00, 10, 01 and 11 and we assume that fitness is  
 126 additive. Hence an individual composed of the two haplotypes 10 and 11 will have  
 fitness  $1 + s_1 + h_2 s_2$ .

128 The trajectory of a beneficial mutation can be decomposed into (i) a initial  
 stochastic phase at low frequency where extinction by drift is likely; (ii) condi-  
 130 tioned on escaping initial extinction (i.e. emergence) on a quasi-deterministic tra-  
 jectory until high frequency; (iii) a second stochastic phase at very high frequency  
 132 where fixation is almost certain (KAPLAN *et al.* 1989). If two mutations segregate  
 simultaneously at low frequency in the stochastic zone they do not influence each  
 134 other and their fates can be assumed to be independent. However, as soon as one  
 mutant has emerged and start to sweep quasi-deterministically it affects the fate of  
 136 the other mutation. When considering only one mutation, once it has emerged its  
 ultimate fixation is certain (which corresponds to the branching process approx-  
 138 imation). The probability of fixation is thus equal to the probability of emergence.

However, when two (or more) mutations interfere, a mutation that has emerged  
 140 can be replaced by a competing mutation and ultimately lost, which is well known  
 in asexual species as the ‘clonal interference’ effect (GERRISH and LENSKI 1998).  
 142 If so, the probability of fixation can be lower than the probability of emergence.

Under tight linkage, so under high selfing rate, this process has to be taken into  
 144 account.

We assume that mutation 1 is the first to escape extinction by drift (although  
 146 it could have been the second to arise), so is sweeping through the population.  
 Its trajectory can be modelled using deterministic equations. The whole process  
 148 is thus conditioned on mutation 1 having escaped extinction by drift initially.  
 Without interference, the probability of fixation of the two mutations,  $P_{12}^*$ , is  
 150 simply equal to the single-locus probability of fixation of the second mutation,  
 given by:

$$P_{12}^* = P_2 = 2s_2 \frac{h_2 + F - h_2 F}{1 + F} \quad (1)$$

152 (CABALLERO and HILL 1992; CHARLESWORTH 1992). Note that  $P_1$  does not ap-  
 pear here because we conditioned on mutation 1 having emerged. Equation 1 leads  
 154 to the classical result that the probability of fixation is higher under outcrossing  
 than under selfing when  $h_2 > 1/2$ . However, more generally, the emergence of  
 156 mutation 2 depends on the genetic background the mutation appears on and on  
 the rate of switch between backgrounds through recombination, which is the cause  
 158 of the ‘Hill-Robertson’ effects we wish to model (HILL and ROBERTSON 1966).  
 Denoting the actual fixation probability of both mutants as  $P_{12}$ , then the degree  
 160 of interference  $R$  is the ratio  $P_{12}/P_{12}^*$ .

In the simplifying case  $h_1 = h_2$ , the dynamics of how the second mutation  
 162 emerges will differ depending on whether  $s_1 < s_2$  or vice versa (see below for  
 more general conditions). If  $s_2 < s_1$ , the dynamics of the first mutation is not  
 164 influenced by the second and cannot be replaced. We thus only need to compute  
 the probability of emergence of the second mutation. This second mutation is  
 166 likely to go extinct unless it appears or recombines onto the first sweep background.



BARTON (1995) outlined a general model to determine this effect for a haploid case.

We will demonstrate how diploidy and selfing can be accounted for in that model and subsequently compute  $\Pi$ , the relative reduction in emergence probability due to interference.

If  $s_1 < s_2$ , then the second mutation can replace the first one if it arises on the wild-type background and if no successful recombinant occurs. We can calculate the probability of this effect, by adjusting the analysis of HARTFIELD and GLÉMIN (2014) to consider two beneficial mutations. We thus need to subtract to  $\Pi$  the probability that mutation 2 replaces mutation 1 once it has emerged, denoted by  $\Pi_{rep}$ . In the general case, the degree of interference will be given by:

$$R = \Pi - \Pi_{rep} \quad (2)$$

In practice,  $R$  must be determined for mutation 2 arising when mutation 1 is at a given frequency  $p$ , and then averaged over the whole possible time of origin of the second mutation (see below for more formal definitions of these conditions).

## A simple first analysis: complete selfing versus outcrossing with free recombination

Before deriving the full model, we can compare the two most extreme cases that can be easily investigated. Under outcrossing and free recombination, the fates of the two mutations are independent so that the probability of fixation of the second mutation, conditioned on the first having emerged, is simply the single locus probability of fixation given by Equation 1 with  $F = 0$  (HALDANE 1927). At the other extreme, with complete selfing recombination is suppressed and interference

188 is maximised. That is, if a second mutation appears in a selfing population, it can  
only fix if it appears on the same genetic background as the original selective sweep,  
190 which is present at frequency  $p$ . Previous theory (HARTFIELD and OTTO 2011;  
HARTFIELD and GLÉMIN 2014) on emergence in this scenario gives the probability  
192 of fixation in the double mutant as:

$$P_{2,self} = \frac{s_1(s_1 + s_2)}{ps_1 + s_2} \quad (3)$$

See, for example, Equation 7 of HARTFIELD and GLÉMIN (2014) with  $s_d = s_1$  and  
194  $s_a = s_1 + s_2$ . The probability of fixation of both alleles thus involves integrating  
Equation 3 over the entire sweep, assuming that the second mutation arises at a  
196 time that is uniformly distributed during the first sweep:

$$\overline{P_{2,self}} = \frac{1}{\tau} \int_0^\tau p P_{2,s}(p(t)) dt \quad (4)$$

where  $\tau$  is the duration of the first sweep. We can also solve Equation 4 over  $p$   
198 from  $p_0$  to  $1 - p_0$ ; the term inside the integral is divided by  $dp/dt = s_1 p(1 - p)$   
to remove time dependence. Solving in the limit of large population size (i.e.  
200  $p_0 = 1/(2Ns_1) \rightarrow 0$ ) leads to  $\overline{P_{2,self}} = s_2/2$  (see Supplementary Material 1): full  
linkage reduces the emergence probability by a half ( $R = 1/2$ ). Intuitively, this  
202 can be explained by the fact that as population size increases, the deterministic  
phase of the first sweep becomes shorter compared to the initial and final stochastic  
204 phases ( $\mathcal{O}(\frac{1}{s})$  vs  $\mathcal{O}(\frac{\ln(2Ns)}{s})$ ; EWING *et al.* (2011)). The second mutation thus occurs  
roughly half of the time during the initial stochastic phase where its probability  
206 of arising on the beneficial background, hence of emerging, is very low ( $p \approx 0$   
in Equation 4). Alternatively, it can appear half of the time during the last

stochastic phase were it almost always originates in the beneficial background and its probability of emerging is approximately  $s_2$  ( $p \approx 1$  in Equation 4). By comparing this result to that with outcrossing and free recombination ( $2h_2s_2$ ), outcrossing is more able to fix both mutants if  $h_2 > 1/4$ , instead of  $h_2 > 1/2$  without interference. However, the advantage to outcrossing may not be as high, since the true degree of interference depends on the strength of both mutations and the recombination rate. In addition, the degree of stochastic interference also depends on the flow of beneficial mutations, which depends on the mating system. We now turn to the full model to quantify exactly the stochastic interference effect.

## Modelling Framework

### Deriving the baseline reduction in emergence probability, $\Pi$

We first need to determine  $\Pi(p)$ , the reduction in the probability of emergence of the second mutation when it arises given the first is at frequency  $p$ . We use branching process methods for calculating mutation emergence if acting over multiple genetic backgrounds. In a seminal paper, BARTON (1995) outlined how to calculate the emergence probability of a focal beneficial allele that changes between different backgrounds in a haploid population. If the probability of switching between backgrounds is of the same order as selection coefficients,  $s$ , and difference in emergence probability over background is of order  $s^2$ , BARTON (1995) showed that the emergence probability of a novel beneficial allele in background  $i$  at time  $t$ ,  $Q_i$ , verifies the following differential equation:

$$-\frac{\partial Q_i}{\partial t} = s_i Q_i + \left( \sum_j M_{i,j} Q_j - Q_i \right) - \frac{Q_i^2}{2} \quad (5)$$

where  $M_{i,j}$  is the probability that offspring in background  $i$  moves to background  $j$  per generation. BARTON (1995) subsequently used this framework to investigate the fixation probability of a second beneficial allele, given that it arises in close linkage to an existing sweep. In this case, the  $M_{i,j}$  terms denote the probability that distinct haplotypes recombine to change the genetic background of the focal allele. We can modify these equations to determine the fixation probability of a novel beneficial allele, given that an existing sweep is present in frequency  $p$ , for a diploid partially-selfing population.

The first sweep arises and proceeds to increase in frequency over time according to classic population genetics theory. As in BARTON (1995) its trajectory is assumed to be deterministic, and thus described by the following differential equation:

$$\frac{dp}{dt} = s_1 p(1-p)(F + h_1 - h_1 F + (1-F)(1-2h_1)p) + \mathcal{O}(s_1) \quad (6)$$

Furthermore, we can scale time by selection setting  $T = s_1 t$  (BARTON 1995).

Let  $Q_1(p)$  denote the probability that the new allele fixes, given that it arises in linkage with the existing sweep (which is at frequency  $p$ ), and  $Q_2(p)$  if it appears on the wild-type (neutral) background. Furthermore, we denote the relative selective advantage of each haplotype (either containing both advantageous alleles, or the second allele only) by  $\theta_1(p)$  and  $\theta_2(p)$ , which are given by (see Supplementary

Material 1 for the full calculation):

$$\begin{aligned}\theta_1(p) &= (F + h_2 - Fh_2)s_2 \\ &+ (1 - p)(F + h_1 - Fh_1 + (1 - F)(1 - 2h_1)p)s_1\end{aligned}\quad (7)$$

$$\begin{aligned}\theta_2(p) &= (F + h_2 - Fh_2)s_2 \\ &- p(F + h_1 - Fh_1 + (1 - F)(1 - 2h_1)p)s_1\end{aligned}\quad (8)$$

Equations 5 of BARTON (1995), which gives the emergence probability of the new allele given it arises on a specific genetic background, can thus be modified as follows:

$$-\frac{\partial Q_1}{\partial T} = -r(1 - F)(1 - p)(Q_1 - Q_2) + \theta_1(p)Q_1 - (1 + F)\frac{Q_1^2}{2}\quad (9)$$

$$-\frac{\partial Q_2}{\partial T} = -r(1 - F)p(Q_2 - Q_1) + \theta_2(p)Q_2 - (1 + F)\frac{Q_2^2}{2}\quad (10)$$

where  $p$  verifies Equation 6. Equations 9 and 10 reflects that selfing reduces recombination by a factor  $1 - F$  (GOLDING and STROBECK 1980; NORDBOG 2000) and increases drift by a factor  $1/(1 + F)$  (POLLAK 1987; CHARLESWORTH 1992; CABALLERO and HILL 1992). In order to simplify the analysis, we follow the approach of BARTON (1995) and investigate the average fixation probability over haplotypes given the first sweep is at a certain frequency, defined as  $\Pi = pQ_1 + (1 - p)Q_2$ , and the difference in emergence probability between the backgrounds,  $\Delta = Q_1 - Q_2$ . We also scale these terms by the probability of fixation of the second allele if unlinked,  $(2s_2(F + h_2 - Fh_2))/(1 + F)$ , so  $\Pi$  lies between 0 and 1. We also introduce the rescaled parameters  $\phi = s_2/s_1$  and  $\rho = r/s_1$  to determine how the relative selective strengths and recombination rates affect allelic interference. We

thus obtain:

$$\frac{\partial \Pi}{\partial T} = H_2 \phi (p(1-p)\Delta^2 - \Pi(1-\Pi)) \quad (11)$$

$$\begin{aligned} \frac{\partial \Delta}{\partial T} &= \Delta(\rho(1-F) - K_1(1-2p) + H_2\phi(\Delta(1-2p) + 2\Pi - 1)) \\ &\quad - K_1\Pi \end{aligned} \quad (12)$$

where  $H_2 = h_2 + F - h_2F$  and  $K_1 = h_1 + F - h_1 + (1-F)(1-2h_1)p$ .

For a given time of origin of the second mutation,  $t$ , the joint solution of this system and Equation 6, 11 and 12 gives  $\Pi(p(t))$ . These equations must be solved numerically by, e.g., using the ‘NDSolve’ function in *Mathematica* (WOLFRAM RESEARCH, INC. 2014). Alternatively, to remove the time dependence ( $\partial t$ ) and directly obtain  $\Pi(p)$ , we can divide both Equations 11 and 12 by  $dp/dt$  (Equation 6). Boundary conditions can be found by looking at the behaviour of the system as  $t \rightarrow \infty$  or  $p \rightarrow 1$ . In this case, we observe that  $\Pi \rightarrow 1$ , reflective of the fact that as the first sweep fixes, interference is not present as the second allele is certain to arise with the existing sweep. Hence the second allele’s fixation probability is not reduced. Boundary conditions for  $\Delta$  can be calculated by assuming  $\phi \ll 1$  (as used in BARTON (1995)) and  $\partial \Delta / \partial T \rightarrow 0$  as  $p \rightarrow 1$ . In this case  $\Delta$  tends to  $(1 - (1-F)h_1) / (1 - (1-F)(h_1 - \rho))$ , which reflects the probability that the second allele can recombine onto the fitter background if appearing on a wild-type chromosome, otherwise it is guaranteed to be lost (BARTON 1995). Although this condition assumes small  $\phi$ , the system of equations appear to work well even with larger  $\phi$  when compared to simulations.

## 280 Deriving the probability of sweep replacement, $\Pi_{rep}$

The previous analysis focussed primarily on the case where the second mutant  
 282 is weaker than the first, hence not considering the possibility that the second sweep  
 could replace the first. In that case, the probability of emergence is equal to the  
 284 probability of fixation:  $P_{12} = \Pi$ . However, if selection acting on it is sufficiently  
 strong then replacement is possible. We need to calculate the probability of such  
 286 replacement occurring and subtract it from the baseline reduction  $\Pi$ . This prob-  
 ability can be calculated by altering the model of HARTFIELD and GLÉMIN (2014),  
 288 which investigated a deleterious allele hitchhiking with a sweep. In our case, the  
 ‘deleterious’ allele is the wildtype allele at the first locus, and the ‘advantageous’  
 290 allele the second fitter sweep. HARTFIELD and OTTO (2011) implemented a sim-  
 ilar rescaling for a haploid model, while YU and ETHERIDGE (2010) provided a  
 292 general stochastic algorithm for investigating this behaviour. By using the same  
 conditions under which the model of HARTFIELD and GLÉMIN (2014) is valid, we  
 294 see that the second mutant can replace the first if:

1.  $(h_2 + F(1 - h_2))s_2 > (1 - (1 - F)h_1)s_1$  and  $(1 - (1 - F)h_2)s_2 > (h_1 + F(1 - h_1))s_1$ ;
- 296 2. The second mutation emerges on the wildtype background (with probability  
 $1 - p$ );
- 298 3. No ‘successful’ recombinant arises during the sweep of the second mutation  
 (‘successful’ meaning that the two beneficial alleles are placed together onto  
 300 the same genetic background and become fixed).

Condition 1 ensures that no overdominance is present; if  $h_1 = h_2 = 1/2$  both  
 302 inequalities reduce to  $s_2 > s_1$ .

Noting  $P_{HH}$  the probability of hitchhiking of the wild allele at locus 1 by the  
 304 beneficial mutation at locus 2,  $P_{12}(p)$  can be written as:

$$\begin{aligned} P_{12} &= pQ_1(p) + (1-p)Q_2(p)(1-P_{HH}) \\ &= \Pi(p) - (1-p)(Q_2(p))P_{HH} \end{aligned} \quad (13)$$

so

$$\Pi_{rep}(p) = (1-p)(\Pi(p) - p\Delta(p))P_{HH} \quad (14)$$

306 where the relationship  $Q_2(p) = \Pi(p) - p\Delta(p)$  is used in Equation 14.

$\Pi(p)$  and  $\Delta(p)$  are given by Equations 11 and 12 but it is necessary to calculate  
 308  $P_{HH}$ . To do so we assume that the population is composed only of the haplotypes  
 carrying just one sweep, 10 and 01, with the complete wild-type haplotype carrying  
 310 no sweeps, 00, being quickly eliminated. We discuss when comparing the model  
 to simulations when these assumptions are valid. We thus need to compute  $\Delta q$ ,  
 312 the change in frequency of the second sweep haplotype and the relative selective  
 advantage of the recombinant haplotype carrying both sweeps, which we denote  $\theta_3$ .  
 314 We define  $q$  as the frequency of the second sweep haplotype to prevent confusion  
 with  $p$  being the frequency of the first sweep haplotype. The derivation of  $\Delta q$  and  
 316  $\theta_3$  are given in Supplementary Material 1, and are given as:

$$\begin{aligned} \Delta q &= (1-q)q(((1-F)(q+h_1(1-2q))-1)s_1 \\ &\quad + (F+h_2-Fh_2+(1-F)(1-2h_2)q)s_2) \end{aligned} \quad (15)$$

$$\begin{aligned} \theta_3(q) &= q(1-(1-F)q-h_1(1-F)(1-2q))s_1 \\ &\quad + (1-q)(F+h_2-Fh_2+(1-F)(1-2h_2)q)s_2 \end{aligned} \quad (16)$$



Following HARTFIELD and GLÉMIN (2014), the emergence probability of the re-  
 318 combinant haplotype carrying both mutations were it to arise,  $P_d$ , is solution of:

$$\frac{dP_d}{dq} = \left( \theta_3(q)P_d(q) - \frac{1+F}{2}P_d(q)^2 \right) / \Delta q \quad (17)$$

Equation 6 of HARTFIELD and GLÉMIN (2014) is then used to calculate  $P_{HH}$ , for  
 320  $\kappa(q) = q(1-q)r(1-F)P_d$ :

$$P_{HH} = \exp \left( - \int_{p=0}^{p=1} \frac{2N\kappa(p)}{s_1 dp/dT} dp \right) \quad (18)$$

which can be inserted into Equation 14. Note that  $P_{HH}$ , hence  $\Pi_{rep}(p)$ , is not  
 322 defined for  $s_2 \leq s_1$  and tends to 0 when  $s_2$  tends to  $s_1$ . For completeness we can  
 thus set  $\Pi_{rep}(p) = 0$  for  $s_2 \leq s_1$ .

## 324 Integration over the sweep trajectory

To obtain the average effect of interference we need to consider all possible  
 326 origins of the second mutation. The average  $R$  for mutation 2 arising uniformly in  
 a long time interval  $[T_0, T_1]$  spanning the sweep of mutation 1 is given by:

$$\bar{R} = \frac{1}{T_1 - T_0} \int_{T_0}^{T_1} \Pi(T) - \Pi_{rep}(p(T)) dT \quad (19)$$

328 As previously showed by BARTON (1995),  $\bar{\Pi}$  can be approximated by:

$$\bar{\Pi} \approx 1 - \frac{1}{T_1 - T_0} \int_{-\infty}^{\infty} (1 - \Pi(T)) dT = 1 - \frac{1}{T_1 - T_0} \int_0^1 \frac{(1 - \Pi(p))}{dp/dT} dp \quad (20)$$

Integration from very ancient time (or equivalently frequency lower than  $1/2N$ )

reflects the fact that mutation 1 can affect the fate of mutation 2 even if it appears after it, when mutation 2 is still in low frequency in the stochastic zone. However, contrary to emergence, the replacement of mutation 1 by mutation 2 can occur only if mutation 2 arises when mutation 1 has already emerged, that is for  $p > p_e \approx (1 + F) / [2Ns_1(h_1 + F - h_1F)]$ . Note that this condition is a bit too restrictive because we should also consider the case when mutation 1 arises after but emerge before mutation 2. Moreover, the distribution of  $p_e$  should be used instead of the average value. However, these complications have only minor quantitative effects (not shown) and as shown below, the reduction in the overall emergence probability (Equation 19) can be written as:

$$\bar{R} \approx 1 - \frac{1}{T_1 - T_0} \left( \int_0^1 \frac{(1 - \Pi(p))}{dp/dT} dp + \int_{p_e}^1 \frac{\Pi_{rep}(p)}{dp/dT} dp \right) \quad (21)$$

A natural choice for  $T_1 - T_0$  would be to use the length of the first sweep. However, as mentioned above, we must consider the effect of mutation 1 when it emerges after mutation 2 has occurred. Moreover, because selfing and dominance affects the length of sweeps (GLÉMIN 2012), averaging over sweep length would not allow direct comparison between different selfing rates and dominance levels. For example, the effect of a sweep is expected to be stronger under selfing than under outcrossing but the time interval when interference can occur is shorter. Finally, interference also depends on the rate of sweep at locus 1, which is also affected by selfing and dominance. All these effects can be taken into account by assuming a steady state of substitutions at a low rate at locus 1 (i.e. no multiple substitutions):

$$\lambda_1 = 4Nu \frac{h_1 + F - h_1F}{1 + F} \quad (22)$$

where time is measured in  $1/s_1$  generations. Following BARTON (1995) we use:

$$\bar{R} \approx 1 - \lambda_1 \left( \int_0^1 \frac{(1 - \Pi(p))}{dp/dT} dp + \int_{p_e}^1 \frac{\Pi_{rep}(p)}{dp/dT} dp \right) \quad (23)$$

352 The justification is as follows. The waiting time between two sweeps is exponentially distributed with mean  $1/\lambda_1$ . If  $T_1 - T_0 < 1/\lambda_1$ , interference between  
354 sweep 1 and sweep 2 thus occurs for a proportion of time  $(T_1 - T_0)/(1/\lambda_1)$ . On average, the effect of sweep 1 on sweep 2 is thus:

$$(1 - \lambda_1(T_1 - T_0)) + \lambda_1(T_1 - T_0) \left( 1 - \frac{1}{T_1 - T_0} \left( \int_0^1 \frac{(1 - \Pi(p))}{dp/dT} dp + \int_{p_e}^1 \frac{\Pi_{rep}(p)}{dp/dT} dp \right) \right) \quad (24)$$

356 leading to Equation 23.

## Simulations

358 We tested the accuracy of the numerical solutions by comparing them to stochastic simulations written in R (R DEVELOPMENT CORE TEAM 2014); code  
360 will be deposited online. When measuring  $\Pi$ , the first allele was seeded at initial frequency  $p$ ; given this frequency and selfing rate  $\sigma$ , the proportion of mutant  
362 homozygotes, heterozygotes, and wild-type homozygotes were calculated based on standard equations with inbreeding (WRIGHT 1951). The second allele was subsequently introduced onto a random background with frequency  $1/2N$  (i.e. as a  
364 single copy). Frequencies of each genotype were altered deterministic by  $w_i/\bar{w}$  due to selection, where  $w_i$  is the fitness of the genotype and  $\bar{w}$  is the population mean  
366 fitness. Recursion equations derived by HEDRICK (1980, Equation 3) then calculated how genotype frequencies changed due to partial selfing. A life-cycle was  
368

completed by resampling  $N$  genotypes from a multinomial distribution to implement random drift. The second allele was tracked until one haplotype fixed, with the simulation repeated until 5000 fixations of the second beneficial allele occurred. It was noted how often each haplotype fixed; from this data we subsequently calculated the frequency that the second allele fixed, relative to the expected result without interference. When measuring  $p_{HH}$  we instead measured how often the haplotype carrying solely the fitter mutant fixed. Confidence intervals were calculated using the Clopper-Pearson method for binomial sampling (CLOPPER and PEARSON 1934).

## Results

### Validity of the analytical/numerical approach

We first tested the accuracy of  $\Pi$ , as given by Equation 11, with stochastic simulations. A subset of comparisons are shown in Figure 1; fuller comparisons are given in Supplementary Material 2. We see that on the whole, the analytical solutions provide an accurate match with simulations for a wide variety of selfing and dominance values. Inaccuracies tend to arise if  $4Nr \gg 1$  so the assumption of tight linkage breaks down. Furthermore, if the second mutant is highly recessive where there is outcrossing ( $h_2 = 0.1$ ), the simulated allele fixation probability is higher than in single-loci models. This is simply because the fixation probability of recessive beneficial mutants are underestimated using the branching-process solution without considering homozygotes genotypes (Equation 1, which holds for highly recessive alleles only in very large population sizes, i.e. at least  $N =$

100,000). For smaller population sizes a diffusion-equation solution,  $P_{dif}$ , offers  
 392 the correct baseline emergence probability (CABALLERO and HILL 1992). Hence  
 rescaling the  $h = 0.1$  simulations by this solution,  $P_{dif}\Pi$  (instead of  $P_2\Pi$  where  $P_2$   
 394 is given by equation 1) offers realistic fixation probabilities that are less than one.

Figure 2 shows the estimate of  $\Pi_{rep}$  compared to simulation data if  $s_2 > s_1$   
 396 and the first sweep is at frequency  $p$ . Generally, if the first mutation is not re-  
 cessive, recombination is low (and/or selfing high) and  $p$  is above  $1/2$  then the  
 398 analytical solution matches up well with simulations. However, if recombination is  
 high ( $2Nr$  approaches 1) and mutations are recessive then the actual replacement  
 400 probability can be underestimated (for example, with  $h_1 = h_2 = 0.2$ ; Figure 2(b)).

By tracking the frequencies of individual haplotypes over time, we can determine  
 402 that in cases where the model fails, it is because two key modelling assumptions  
 are violated (Supplementary Material 2). In particular, the wild-type haplotype is  
 404 not rapidly eliminated, so not all recombination occurs between the two selected  
 haplotypes. Hence Equation 18 would overestimate the effect of recombination,  
 406 although the error would not be large if net recombination is low. Furthermore the  
 first sweep does not increase in frequency at the start of the process, also violating  
 408 the assumption that it will compete with the second sweep. This behaviour is also  
 observed if both mutants are dominant in outcrossing populations ( $h_1 = h_2 = 0.8$ ;  
 410 see Supplementary Material 1). To calculate a more accurate replacement prob-  
 ability in this case, it would be necessary to explicitly account for the frequency  
 412 of the neutral class, or how recessive beneficial mutations drift at a low frequency.  
 Unfortunately it will probably be unfeasible to produce tractable analytical solu-  
 414 tions in either scenario. Hence in subsequent analyses when  $\phi > 1$ , we will focus  
 on additive or dominant mutations ( $h \geq 1/2$ ).

## 416 Additive case

Under additive selection ( $h_1 = h_2 = 1/2$ ), selfing has no effect on the single  
 418 probability of fixation. This case thus allows analyzing the effect of selfing on re-  
 combination only. Moreover, for this specific case, results can be obtained directly  
 420 by rescaling haploid models. Equations 11 and 12 become:

$$\frac{\partial \Pi}{\partial p} = \frac{\phi((1-p)p\Delta(p)^2 - \Pi(p)(1 - \Pi(p)))}{(1-p)p} \quad (25)$$

$$\frac{\partial \Delta}{\partial p} = \frac{\Delta(p)(2\rho_F + \phi(2\Pi(p) - 1) + (1 - 2p)(\phi\Delta(p) - 1)) - \Pi(p)}{(1-p)p} \quad (26)$$

where  $\rho_F = \rho(1 - F)/(1 + F)$ . Equations 25, 26 are similar to BARTON'S (1995)  
 422 6a and 6b for haploids, except with  $p(1 - p)$  terms in the denominator since our  
 equations are as a function of the first sweep frequency, and that the recombination  
 424 rate is decreased by  $2(1 - F)/(1 + F)$ . The latter scaling reflects how the population  
 size is increased by a factor of 2 in diploids compared to haploids; how inbreeding  
 426 magnifies drift by a factor  $1/(1 + F)$ , increasing the speed at which the first sweep  
 fixes and reducing the potential for recombination to act; and how the effective  
 428 recombination rate is reduced by  $1 - F$  (GLÉMIN 2012; HARTFIELD and GLÉMIN  
 2014). Here, we can use the approximations given by Equations 8 and 9a of  
 430 BARTON (1995) with the appropriate rescaling:

$$\int_0^1 \frac{(1 - \Pi(p))}{dp/dT} dp \approx -\frac{2}{1 + F} \frac{\ln(1 - \phi^{2\rho_F})}{\phi} \quad \text{for small } \phi \quad (27)$$

$$\approx \frac{2}{1 + F} \frac{1}{(\phi + 2\rho_F)^2 - 1/4} \quad \text{for large } \phi + \rho_F \quad (28)$$

Approximation for the replacement probability can also be obtained (see details  
 432 in Supplementary Material 1).  $P_{HH}$  can be obtained by replacing  $s_a$  by  $s_2$  and  $s_d$   
 by  $s_1$  in Equation 8 of HARTFIELD and GLÉMIN (2014):

$$P_{HH} = \phi^{-4Nr \frac{1-F}{1+F} \frac{\phi}{(\phi-1)^2}} \quad (29)$$

434 Similarly,  $Q_2(p)$  can be obtained by replacing  $s_a$  by  $s_2$  and  $s_d$  by  $s_2 - s_1$  in Equation  
 7 of HARTFIELD and GLÉMIN (2014) and scaling by  $s_2$ :

$$Q_2(p) = \frac{\phi - 1}{\phi - 1 + p} \quad (30)$$

436 Integrating over the sweep trajectory we obtain:

$$\begin{aligned} \int_{p_e}^1 \frac{\Pi_{rep}(p)}{dp/dT} dp &= \phi^{-4Nr \frac{1-F}{1+F} \frac{\phi}{(\phi-1)^2}} \int_{1/Ns_1}^1 \frac{2}{p(1+F)} \frac{\phi - 1}{\phi - 1 + p} dp \\ &= \frac{2 \ln(Ns_1(1 - 1/\phi))}{1+F} \phi^{-4Nr \frac{1-F}{1+F} \frac{\phi}{(\phi-1)^2}} \end{aligned} \quad (31)$$

Quantitative inspection of previous equations shows that the emergence effect  
 438 (or ‘stochastic interference’ effect) is more important than the replacement effect  
 (Figure 3). The emergence effect is higher for low  $\phi$  values, and can be very  
 440 high; Equation 27 tends to  $\infty$  when  $\phi$  or  $\rho_F$  tend towards 0. On the contrary,  
 Equation 31 tends towards  $2 \ln(Ns_1)/(1+F)$  as  $\phi$  tends towards  $\infty$ . This difference  
 442 can be explained because (i) mutations are more sensitive to interference in the  
 stochastic zone than once they have emerged, and (ii) the effect of interference is  
 444 longer on emergence than on replacement. Consequently, the effect of selfing is  
 more important for low  $\phi$  values when emergence is the most important process

than for high  $\phi$  values when replacement predominates as illustrated on Figure 3).

The same figure also illustrates how the effect of a sweep can extend across long chromosome tracts for high selfing rates.

In previous equations, the scaling factor  $2/(1+F)$  arises because the length of the sweep is in  $\mathcal{O}(\frac{1+F}{2s_1})$  but we scaled time by  $1/s_1$  to conserve the same scaling for any selfing rate. Equations 27, 28 and 31 demonstrate the two opposite effects of selfing: the reduction in effective recombination reduces the probability of emergence, and also increases the probability of replacement but on a shorter period of time as sweeps are shorter (GLÉMIN 2012). For loose linkage, the effect of selfing on recombination is the strongest so that selfing globally decreases the probability of fixation. However, for tight linkage interference occurs for any selfing rate, such that the dominant effect of selfing is the reduction in sweep length (Figure 4). When  $4Nr < 1.386 \frac{(\phi-1)^2}{\phi \ln(\phi)}$ , replacement is more likely under outcrossing than complete selfing (see Supplementary Material 1). Emergence is also more likely under selfing than outcrossing when  $\rho < 0.207\phi$  (but for  $\phi > 1$  linkage only very weakly affects the probability of emergence). When  $\phi < 1$ , interference is stronger under outcrossing only for very tight linkage, that is for  $\rho < -\epsilon/4 \ln(\phi)$ , where  $\epsilon$  is the residual outcrossing rate under selfing (see Supplementary Material 1).

## Effect of dominance on interference

For high selfing rates, the interference process is well approximated by the additive case. However, to get a complete picture of the effect of selfing we need to analyse how dominance affects the interference process. Here, we will consider fully outcrossing populations before considering the global effect of mating systems on



the rate of adaptation. When considering dominance, two questions arise: which  
 470 kind of mutations cause the strongest interference and which ones are the most  
 sensitive.

472 The effect of interference for different combinations of dominance levels are  
 presented in Figure 5 for  $\phi < 1$ . The main difference in sweep dynamics is  
 474 the length of the two stochastic phases. Because a mutation causes interference  
 mainly during its deterministic trajectory, which is similar for any dominance  
 476 level ( $\mathcal{O}(1/2Ns_1)$  for any  $h_1$ ; EWING *et al.* (2011)), the dominance level of muta-  
 tion 1 has thus only a weak effect on the probability of emergence of mutation  
 478 2. However, the sensitivity of mutation 2 to interference strongly depends on its  
 dominance level, as it depends on the length of its initial stochastic phase, which is  
 480  $\mathcal{O}(\frac{\ln(2Ns_2)}{2Nh_2s_2})$  (EWING *et al.* 2011). Recessive mutations are thus more sensitive to in-  
 terference than additive and dominant ones. Interference thus reinforces Haldane's  
 482 sieve, in the sense that recessive mutations are even less likely to emerge in out-  
 crossing populations, if tightly linked to the initial sweep. In the case of strong  
 484 interference, this effect can be substantial as illustrated in Figure 5. Interestingly,  
 this effect is not symmetrical since dominant mutations only exhibit slightly less  
 486 interference than additive mutations. As far as we know this effect has not been  
 described before and it leads to several predictions. For instance, the dominance  
 488 spectrum of fixed beneficial mutation should vary with recombination rate (Fig-  
 ure 6). The same pattern is observed for replacement but it is quantitatively  
 490 weaker (Supplementary Material 1) as already noted by HARTFIELD and GLÉMIN  
 (2014) for hitchhiking of deleterious mutations.

## Conditions under which selection is more efficient under outcrossing than under selfing

We now have all the ingredients to study the range of conditions under which selfing reduces the rate of adaptation. Without interference, and without any other factor increasing drift effects in selfers, selfing reduces (respectively increases) adaptation from new dominant (respectively recessive) mutations (CHARLESWORTH 1992; CABALLERO and HILL 1992). How does interference affect this condition? This question can be explored by considering a steady flow of mutations and analyzing  $P_{12} = \bar{R}P_2$  where  $\bar{R}$  is given by Equation 23. As shown in Supplementary Material 1, the total effect of interference on replacement will be no more than of the order of  $\ln(2Ns_1)$  (which is always lower than few tens) while the effect on emergence can be much more important. In what follows we will thus focus on the case where  $\phi < 1$ .

Figure 7 illustrates how selfing can affect the probability of fixation of the second mutation compare to the single locus case. Under a low adaptation regime ( $\theta = 0.02$ ) interference is weak and the probability of fixation is reduced only in highly selfing species. This reduction is moderate and selfing species are still better than outcrossing ones at fixing recessive mutations. Under strong adaptation regime ( $\theta = 0.2$ ), interference can be substantial even in mixed mating species and adaptation can be fully impeded in highly selfing species if  $\lambda_1 > 1/\int_0^1 \frac{(1-\Pi(p))}{dp/dT} dp$  (see BARTON (1995)). This threshold depends on  $\phi$ , which means that, even under a low adaptation regime, weak mutations can be affected by interference in highly selfing species. Figure 8 shows the joined dominance and selection spectrum for which selection is more efficient in outcrossing than in highly selfing ( $F = 0.95$ )

species. Strongly beneficial mutations are very weakly affected by interference so only dominant mutations are more efficiently selected in outcrossing than in selfing species. However, (very) weak beneficial mutations are better fixed in outcrossing populations, whatever their dominance level.

## Discussion

### Interference between beneficial mutations with partial selfing and dominance

Multi-locus models of adaptation in partial self-fertilising species can inform on how the interplay between homozygote creation, and reduction in recombination, both affect selection acting on multiple sites. It is already known that the presence of linked deleterious variation means that mildly recessive beneficial mutations ( $h$  just less than  $1/2$ ) are more able to fix in outcrossers by recombining away from the deleterious allele, in contrast to Haldane's Sieve (HARTFIELD and GLÉMIN 2014). More generally, genome wide background selection can substantially reduce adaptation in highly selfing species (KAMRAN-DISFANI and AGRAWAL 2014). Yet the extent that other linkage effects, especially between beneficial mutations, remain unknown.

Here we extended several previous models of selection interference to consider how adaptation is impeded in partially-selfing organisms. We considered two possibilities. First, given that an existing sweep is progressing through the population, subsequent mutations confer a lower selective advantage and can only fix if recombining onto the fitter genetic background (the 'stochastic interference' effect). Al-

ternatively, a second mutant could be fitter and replace the existing sweep, unless recombination unites the two alleles (the ‘replacement’ effect). We found that the stochastic interference effect is generally stronger than the replacement effect, and is more likely to lead to loss of beneficial mutations (Figure 3).

Furthermore, selection interference leads to a reinforcement of Haldane’s Sieve in outcrossing populations, as recessive mutations are more likely to be lost by drift when rare (Figure 5). Finally, interference can be substantial in selfing populations if there exists high rates of adaptive mutation (Figure 7). As a consequence, weakly-beneficial mutations are more likely to be fixed in outcrossers, irrespective of their dominance level (Figure 8). These findings thus contribute to a body of literature as to when the predictions of Haldane’s Sieve should break down, or otherwise be weakened. Other examples include the fixation probability of mutations being independent of dominance if arising from previously deleterious variation (ORR and BETANCOURT 2001); more generally, outcrossers are more able to fix mutations with any dominance level compared to selfers if arising from standing variation, and when multiple linked deleterious variants are present (GLÉMIN and RONFORT 2013). Conversely, dominant mutations can be lost in metapopulations due to strong drift effects (PANNELL *et al.* 2005).

## Heuristic extension to multiple sweeps

In our model we assumed that no more than two beneficial mutations can simultaneously interfere in the population. However, even if mutations occur rarely enough to lead to multiple mutations interfering under outcrossing, the presence of a few sweeping mutations throughout a genome can jointly interfere in highly selfing species, further reducing the rate of adaptation. Obtaining a general model

of multiple substitutions in a diploid partially selfing populations is a difficult task, but we can get a raw picture of the effect of selfing on adaptation at many loci by an heuristic extension of the haploid model of WEISSMAN and BARTON (2012). Assuming the same selective advantage for all mutations,  $s$ , the rate of adaptation can be approximated by solving the following equation for  $\lambda$  (see Supplementary Material 3):

$$\lambda = \Theta \frac{h + F - hF}{1 + F} \left( 1 - \frac{2\lambda}{R_s(1 - F)} \right) e^{-\frac{4\lambda}{(1-F)^2}} \quad (32)$$

where  $\Theta = 4NU_b$  is the population genomic rate of beneficial mutations and  $R_s$  is the length of the genetic map scaled by  $s$ . Using this equation we can show that shows that for a moderate flow of beneficial mutation (where no interference occurs under outcrossing) adaptation can be substantially reduced for very high selfing rate (see Figure 1 in Supplementary Material 2). Moreover, for  $s_1 = s_2$  the two-locus model (Equation 23) underestimates the effect of interference as  $\Theta$  increases. While the two locus model suggests that only weak mutations should be substantially affected by strong mutations, the multiple sweep model suggests that mutations of similar effect can also interfere in highly selfing species.

## Causes of limits to adaptation in selfing species

We have already shown in a previous paper how adaptation can be impeded in low-recombining selfing species due to the hitch-hiking of linked deleterious mutations (HARTFIELD and GLÉMIN 2014), with KAMRAN-DISFANI and AGRAWAL (2014) demonstrating that background selection can also greatly limit adaptation. Hence the question arises as to whether deleterious mutations or multiple sweeps are more likely to impede overall adaptation rates in selfing species.

Background selection causes a general reduction in variation across the genome by reducing  $N_e$  (NORDBORG *et al.* 1996); here the overall reduction in emergence probability is proportional to  $N_e/N$ , where  $N_e$  is mediated by the strength and rate of deleterious mutations (BARTON 1995; JOHNSON and BARTON 2002), and thus affects all mutations in the same way. Because of background selection, selfing is thus expected to globally reduce adaptation without affecting the spectrum of fixed mutations. Similarly, adaptation from standing variation, which depends on polymorphism level, is expected to be affected by the same proportion (GLÉMIN and RONFORT 2013). Alternatively, interference between beneficial mutations is mediated by  $\phi$ , the ratio of the selection coefficients of the sweeps. Weak mutations are thus more affected than stronger ones and the effect of interference cannot be summarised by a single change in  $N_e$  (BARTON 1995; WEISSMAN and BARTON 2012). Because of selective interference, selfing is also expected to shift the spectrum of fixed mutations towards those of strong effect. Interestingly, WEISSMAN and BARTON (2012) showed that neutral polymorphism can be significantly reduced by multiple sweeps even if sweeps do not interfere among them. This suggests that in selfing species, adaptation from standing variation should be more limited than predicted by single-locus theory (GLÉMIN and RONFORT 2013). Selective interference could thus affect both the number and type of adaptations observed in selfing species.

However, reflecting on this logic, both processes should interact and we therefore predict that background selection will have a diminishing-returns effect. As background selection lowers  $N_e$  then the substitution rate of beneficial mutations will be reduced (since it is proportional to  $N_e\mu$  for  $\mu$  the per-site mutation rate), hence interference between beneficial mutations will subsequently be alleviated.

No such respite will be available if the adaptive mutation rate increases; on the  
 610 contrary, interference will increase (Figure 7). Hence interference between adapt-  
 ive mutations should play a strong role in reducing the fitness of selfing species,  
 612 causing them to be an evolutionary dead-end. Further theoretical work teasing  
 apart these effects would be desirable. Given the complexity of such analyses,  
 614 simulation studies similar to those of KAMRAN-DISFANI and AGRAWAL (2014)  
 would be a useful approach to answering this question.

616 In a recent study, LANDE and PORCHER (2015) demonstrated that once the  
 selfing rate became critically high, selfing organisms then purged a large amount  
 618 of quantitative trait variation, limiting their ability to respond to selection in a  
 changing environment. This mechanism provides an alternative basis as to how  
 620 selfing organisms are an evolutionary dead-end. However, they only consider pop-  
 ulations at equilibrium and our results suggest that directional selection should  
 622 further reduce quantitative genetic variation due to selective interference among  
 mutations. Subsequent theoretical work is thus needed to determine the impact of  
 624 interference via sweeps on the loss of quantitative variation. Furthermore, complex  
 organisms (i.e. those where many loci underlie phenotypic selection) are less likely  
 626 to adapt to a moving optimum compared to when only a few traits are under se-  
 lection (MATUSZEWSKI *et al.* 2014), and can also purge genetic variance for lower  
 628 selfing rates (LANDE and PORCHER 2015). Complex selfing organisms should be  
 less able to adapt to environmental changes.

## 630 Empirical Implications

The models derived here lead to several testable predictions for the rate of adaptation between selfing and outcrossing sister-species. These include an overall reduction in the adaptive substitution rate in selfing populations; a shift in the distribution of fitness-effects in selfing organisms to only include strongly-selected mutations that escape interference; and a difference in the dominance spectrum of adaptive mutations in outcrossers compared to selfers, as already predicted by single-locus theory (CHARLESWORTH 1992) and observed with quantitative trait loci (QTLs) for domesticated crops (RONFORT and GLÉMIN 2013).

So far, few studies currently exist that directly compare adaptation rates and potential between related selfing and outcrossing species, but they are in agreement with the predictions of the model. In plants, the self-incompatible *Capsella grandiflora* exhibited much higher adaptation rates (where  $\alpha = 40\%$  of non-synonymous substations were estimated to be driven by positive selection using the McDonald-Kreitman statistic; SLOTTE *et al.* (2010)) than in the selfing related species *Arabidopsis thaliana* (where  $\alpha$  is not significantly different from zero). Similarly, the outcrossing snail *Physa acuta* exhibited significant adaptation rates ( $\alpha = 0.54$ ), while no evidence for adaptation in the selfing snail was obtained (BURGARELLA *et al.* 2015); in fact, evidence suggests that deleterious mutations segregate due to drift ( $\alpha = -0.19$ ). In agreement with the predicted inefficacy of selection on weak mutations, QIU *et al.* (2011) also observed significantly lower selection on codon usage in the *Capsella* and *Arabidopsis* selfers than in their outcrossing sister species.

In addition, as only strong advantageous mutations are expected to escape loss



654 through selection interference, this result can explain why selective sweeps cover-  
ing large tracts of a genome are commonly observed, as with *Arabidopsis thaliana*  
656 (LONG *et al.* 2013) and *Caenorhabditis elegans* (ANDERSEN *et al.* 2012). Extended  
sweep signatures can also be explained by reduced effective recombination rates in  
658 selfing genomes. Finally, selection interference between beneficial mutations could  
explain why maladaptive QTLs are observed as underlying fitness components,  
660 as observed in *Arabidopsis thaliana* (ÅGREN *et al.* 2013). Direct QTL compar-  
isons between selfing and outcrossing sister species would therefore be desirable to  
662 determine to what extent selection interference leads to maladaptation in selfing  
species.

664 *Acknowledgements:* M.H. was funded by an ATIP-Avenir grant from CNRS  
and INSERM to Samuel Alizon, a Marie Curie International Outgoing Fellowship  
666 grant number MC-IOF-622936 (project SEXSEL), and also acknowledges addi-  
tional support from the CNRS and the IRD. S.G. is supported by the French  
668 CNRS and a Marie Curie Intra-European Fellowship grant number IEF-623486  
(project SELFADAPT). This work was also supported by a grant from the Agence  
670 Nationale de la Recherche to S.G. (ANR-11-BSV7-013-03).

## Literature Cited

672 ÅGREN, J., C. G. OAKLEY, J. K. MCKAY, J. T. LOVELL, and D. W. SCHEM-  
SKE, 2013 Genetic mapping of adaptation reveals fitness tradeoffs in *Arabidopsis*  
674 *thaliana*. *Proc. Natl. Acad. Sci. USA* **110**: 21077–21082.

ANDERSEN, E. C., J. P. GERKE, J. A. SHAPIRO, J. R. CRISSMAN, R. GHOSH,

- 676 *et al.*, 2012 Chromosome-scale selective sweeps shape *Caenorhabditis elegans*  
genomic diversity. *Nat. Genet.* **44**: 285–290.
- 678 BAKER, H. G., 1955 Self-compatibility and establishment after ‘long-distance’  
dispersal. *Evolution* **9**: 347–349.
- 680 BAKER, H. G., 1967 Support for Baker’s Law—As a Rule. *Evolution* **21**: 853–856.
- BARRIER, M., C. D. BUSTAMANTE, J. YU, and M. D. PURUGGANAN, 2003  
682 Selection on Rapidly Evolving Proteins in the *Arabidopsis* Genome. *Genetics*  
**163**: 723–733.
- 684 BARTON, N. H., 1995 Linkage and the limits to natural selection. *Genetics* **140**:  
821–841.
- 686 BILLIARD, S., M. LÓPEZ-VILLAVICENCIO, B. DEVIER, M. E. HOOD, C. FAIR-  
HEAD, *et al.*, 2011 Having sex, yes, but with whom? Inferences from fungi on  
688 the evolution of anisogamy and mating types. *Biol. Rev. Camb. Philos. Soc.* **86**:  
421–442.
- 690 BRANDVAIN, Y., T. SLOTTE, K. M. HAZZOURI, S. I. WRIGHT, and G. COOP,  
2013 Genomic identification of founding haplotypes reveals the history of the  
692 selfing species *Capsella rubella*. *PLoS Genet.* **9**: e1003754.
- BURGARELLA, C., P. GAYRAL, M. BALLENGHIEN, A. BERNARD, P. DAVID,  
694 *et al.*, 2015 Molecular evolution of freshwater snails with contrasting mating  
systems. *Mol. Biol. Evol.* **32**: 2403–2416.
- 696 CABALLERO, A., and W. G. HILL, 1992 Effects of partial inbreeding on fixation  
rates and variation of mutant genes. *Genetics* **131**: 493–507.

- 698 CHARLESWORTH, B., 1992 Evolutionary rates in partially self-fertilizing species.  
Am. Nat. **140**: 126–148.
- 700 CHARLESWORTH, B., A. J. BETANCOURT, V. B. KAISER, and I. GORDO,  
2009 Genetic recombination and molecular evolution. Cold Spring Harb. Symp.  
702 Quant. Biol. **74**: 177–186.
- CLARK, R. M., G. SCHWEIKERT, C. TOOMAJIAN, S. OSSOWSKI, G. ZELLER,  
704 *et al.*, 2007 Common Sequence Polymorphisms Shaping Genetic Diversity in  
*Arabidopsis thaliana*. Science **317**: 338–342.
- 706 CLOPPER, C. J., and E. S. PEARSON, 1934 The use of confidence or fiducial  
limits illustrated in the case of the binomial. Biometrika **26**: 404–413.
- 708 EWING, G., J. HERMISSON, P. PFAFFELHUBER, and J. RUDOLF, 2011 Selective  
sweeps for recessive alleles and for other modes of dominance. J. Math. Bio. **63**:  
710 399–431.
- FELSENSTEIN, J., 1974 The evolutionary advantage of recombination. Genetics  
712 **78**: 737–756.
- FISHER, R. A., 1930 *The genetical theory of natural selection*. The Clarendon  
714 Press, Oxford.
- FISHER, R. A., 1941 Average excess and average effect of a gene substitution.  
716 Ann. Eugen. **11**: 53–63.
- FOURNIER-LEVEL, A., A. KORTE, M. D. COOPER, M. NORDBORG,  
718 J. SCHMITT, *et al.*, 2011 A map of local adaptation in *Arabidopsis thaliana*.  
Science **334**: 86–89.

- 720 GERRISH, P. J., and R. LENSKI, 1998 The fate of competing beneficial mutations  
in an asexual population. *Genetica* **102–103**: 127–144.
- 722 GIOTI, A., A. A. MUSHEGIAN, R. STRANDBERG, J. E. STAJICH, and H. JOHAN-  
NESSON, 2012 Unidirectional evolutionary transitions in fungal mating systems  
724 and the role of transposable elements. *Mol. Biol. Evol.* **29**: 3215–3226.
- GLÉMIN, S., 2012 Extinction and fixation times with dominance and inbreeding.  
726 *Theor. Popul. Biol.* **81**: 310–316.
- GLÉMIN, S., and N. GALTIER, 2012 Genome evolution in outcrossing versus self-  
728 ing versus asexual species. In M. Anisimova, editor, *Methods Mol. Biol.*, volume  
855, chapter 11. Humana Press, 311–335.
- 730 GLÉMIN, S., and J. RONFORT, 2013 Adaptation and maladaptation in selfing  
and outcrossing species: New mutations versus standing variation. *Evolution*  
732 **67**: 225–240.
- GOLDBERG, E. E., J. R. KOHN, R. LANDE, K. A. ROBERTSON, S. A. SMITH,  
734 *et al.*, 2010 Species selection maintains self-incompatibility. *Science* **330**: 493–  
495.
- 736 GOLDING, G. B., and C. STROBECK, 1980 Linkage disequilibrium in a finite  
population that is partially selfing. *Genetics* **94**: 777–789.
- 738 GOODWILLIE, C., S. KALISZ, and C. G. ECKERT, 2005 The evolutionary enigma  
of mixed mating systems in plants: Occurrence, theoretical explanations, and  
740 empirical evidence. *Annu. Rev. Ecol. Evol. Syst.* **36**: 47–79.

- GOSMANN, T. I., B.-H. SONG, A. J. WINDSOR, T. MITCHELL-OLDS, C. J.  
742 DIXON, *et al.*, 2010 Genome wide analyses reveal little evidence for adaptive  
evolution in many plant species. *Mol. Biol. Evol.* **27**: 1822–1832.
- 744 HALDANE, J. B. S., 1927 A mathematical theory of natural and artificial selection,  
part V: Selection and mutation. *Math. Proc. Cambridge Philos. Soc.* **23**: 838–  
746 844.
- HANCOCK, A. M., B. BRACHI, N. FAURE, M. W. HORTON, L. B. JARYMOW-  
748 YCZ, *et al.*, 2011 Adaptation to climate across the *Arabidopsis thaliana* genome.  
*Science* **334**: 83–86.
- 750 HARTFIELD, M., and S. GLÉMIN, 2014 Hitchhiking of deleterious alleles and the  
cost of adaptation in partially selfing species. *Genetics* **196**: 281–293.
- 752 HARTFIELD, M., and S. P. OTTO, 2011 Recombination and hitchhiking of dele-  
terious alleles. *Evolution* **65**: 2421–2434.
- 754 HEDRICK, P. W., 1980 Hitchhiking: A comparison of linkage and partial selection.  
*Genetics* **94**: 791–808.
- 756 HELLER, R., and J. MAYNARD SMITH, 1978 Does Muller’s ratchet work with  
selfing? *Genet. Res.* **32**: 289–293.
- 758 HILL, W. G., and A. ROBERTSON, 1966 The effect of linkage on limits to artificial  
selection. *Genet. Res.* **8**: 269–294.
- 760 HOUGH, J., R. J. WILLIAMSON, and S. I. WRIGHT, 2013 Patterns of selection  
in plant genomes. *Annu. Rev. Ecol. Evol. Syst.* **44**: 31–49.

- HUBER, C. D., M. NORDBORG, J. HERMISSON, and I. HELLMANN, 2014 Keeping  
It Local: Evidence for Positive Selection in Swedish *Arabidopsis thaliana*. Mol.  
Biol. Evol. **31**: 3026–3039.
- IGIC, B., and J. W. BUSCH, 2013 Is self-fertilization an evolutionary dead end?  
New Phytol. **198**: 386–397.
- IGIC, B., and J. R. KOHN, 2006 The distribution of plant mating systems: study  
bias against obligately outcrossing species. Evolution **60**: 1098–1103.
- IGIC, B., R. LANDE, and J. R. KOHN, 2008 Loss of Self-Incompatibility and Its  
Evolutionary Consequences. Int. J. Plant Sci. **169**: 93–104.
- JARNE, P., and J. R. AULD, 2006 Animals mix it up too: the distribution of  
self-fertilization among hermaphroditic animals. Evolution **60**: 1816–1824.
- JOHNSON, T., and N. H. BARTON, 2002 The effect of deleterious alleles on ad-  
aptation in asexual populations. Genetics **162**: 395–411.
- KAMRAN-DISFANI, A., and A. F. AGRAWAL, 2014 Selfing, adaptation and back-  
ground selection in finite populations. J. Evol. Biol. **27**: 1360–1371.
- KAPLAN, N. L., R. R. HUDSON, and C. H. LANGLEY, 1989 The “hitchhiking  
effect” revisited. Genetics **123**: 887–899.
- LANDE, R., and E. PORCHER, 2015 Maintenance of quantitative genetic variance  
under partial self-fertilization, with implications for evolution of selfing. Genetics  
**200**: 891–906.
- LANDE, R., and D. W. SCHEMSKE, 1985 The Evolution of Self-Fertilization and  
Inbreeding Depression in Plants. I. Genetic Models. Evolution **39**: 24–40.

- 784 LONG, Q., F. A. RABANAL, D. MENG, C. D. HUBER, A. FARLOW, *et al.*, 2013  
Massive genomic variation and strong selection in *Arabidopsis thaliana* lines  
786 from Sweden. *Nat. Genet.* **45**: 884–890.
- LYNCH, M., J. CONERY, and R. BURGER, 1995 Mutation accumulation and the  
788 extinction of small populations. *Am. Nat.* **146**: 489–518.
- MATUSZEWSKI, S., J. HERMISSON, and M. KOPP, 2014 Fisher’s geometric model  
790 with a moving optimum. *Evolution* **68**: 2571–2588.
- MULLER, H. J., 1932 Some genetic aspects of sex. *Am. Nat.* **66**: 118–138.
- 792 NORDBORG, M., 2000 Linkage disequilibrium, gene trees and selfing: An ancestral  
recombination graph with partial self-fertilization. *Genetics* **154**: 923–929.
- 794 NORDBORG, M., B. CHARLESWORTH, and D. CHARLESWORTH, 1996 The effect  
of recombination on background selection. *Genet. Res.* **67**: 159–174.
- 796 ORR, H. A., and A. J. BETANCOURT, 2001 Haldane’s sieve and adaptation from  
the standing genetic variation. *Genetics* **157**: 875–884.
- 798 OTTO, S. P., and M. W. FELDMAN, 1997 Deleterious mutations, variable epi-  
static interactions, and the evolution of recombination. *Theor. Popul. Biol.* **51**:  
800 134–147.
- PAAPE, T., T. BATAILLON, P. ZHOU, T. J. Y. KONO, R. BRISKINE, *et al.*,  
802 2013 Selection, genome-wide fitness effects and evolutionary rates in the model  
legume *Medicago truncatula*. *Mol. Ecol.* **22**: 3525–3538.

- 804 PANNELL, J. R., M. E. DORKEN, and S. M. EPPLEY, 2005 ‘Haldane’s Sieve’ in  
a metapopulation: sifting through plant reproductive polymorphisms. Trends  
806 Ecol. Evol. **20**: 374–379.
- POLLAK, E., 1987 On the theory of partially inbreeding finite populations. I.  
808 Partial selfing. Genetics **117**: 353–360.
- QIU, S., K. ZENG, T. SLOTTE, S. WRIGHT, and D. CHARLESWORTH, 2011  
810 Reduced efficacy of natural selection on codon usage bias in selfing *Arabidopsis*  
and *Capsella* species. Genome Biol. Evol. **3**: 868–880.
- 812 R DEVELOPMENT CORE TEAM, 2014 *R: A Language and Environment for Stat-*  
*istical Computing*. R Foundation for Statistical Computing, Vienna, Austria.
- 814 RONFORT, J., and S. GLÉMIN, 2013 Mating System, Haldane’s Sieve, and the  
Domestication Process. Evolution **67**: 1518–1526.
- 816 SCHEMSKE, D. W., and R. LANDE, 1985 The Evolution of Self-Fertilization and  
Inbreeding Depression in Plants. II. Empirical Observations. Evolution **39**: 41–  
818 52.
- SLOTTE, T., 2014 The impact of linked selection on plant genomic variation. Brief.  
820 Funct. Genomics **13**: 268–275.
- SLOTTE, T., T. BATAILLON, T. T. HANSEN, K. ST. ONGE, S. I. WRIGHT,  
822 *et al.*, 2011 Genomic determinants of protein evolution and polymorphism in  
*Arabidopsis*. Genome Biol. Evol. **3**: 1210–1219.
- 824 SLOTTE, T., J. P. FOXE, K. M. HAZZOURI, and S. I. WRIGHT, 2010 Genome-  
Wide Evidence for Efficient Positive and Purifying Selection in *Capsella gran-*



- 826 *diffusa*, a Plant Species with a Large Effective Population Size. Mol. Biol. Evol.  
27: 1813–1821.
- 828 STEBBINS, G. L., 1957 Self fertilization and population variability in the higher  
plants. Am. Nat. 91: 337–354.
- 830 WEISSMAN, D. B., and N. H. BARTON, 2012 Limits to the rate of adaptive  
substitution in sexual populations. PLoS Genet. 8: e1002740.
- 832 WOLFRAM RESEARCH, INC., 2014 *Mathematica Edition: Version 10.0*. Wolfram  
Research, Inc., Champaign, Illinois.
- 834 WRIGHT, S., 1951 The genetical structure of populations. Ann. Eugen. 15: 323–  
354.
- 836 WRIGHT, S. I., and S. C. H. BARRETT, 2010 The long-term benefits of self-  
rejection. Science 330: 459–460.
- 838 WRIGHT, S. I., S. KALISZ, and T. SLOTT, 2013 Evolutionary consequences of  
self-fertilization in plants. Proc. R. Soc. B 280: 20130133.
- 840 YU, F., and A. M. ETHERIDGE, 2010 The fixation probability of two competing  
beneficial mutations. Theor. Popul. Biol. 78: 36–45.

Table 1: Glossary of Notation.

| Symbol               | Usage                                                                                                 |
|----------------------|-------------------------------------------------------------------------------------------------------|
| $2N$                 | Overall (diploid) population size                                                                     |
| $s_1, s_2$           | Fitness coefficients of original and new advantageous alleles                                         |
| $h_1, h_2$           | Dominance coefficients of original and new advantageous alleles                                       |
| $p$                  | Frequency of first advantageous allele at timepoint                                                   |
| $\sigma$             | Proportion of matings that are self-fertilising                                                       |
| $F$                  | WRIGHT'S (1951) inbreeding coefficient, $\sigma/(2 - \sigma)$                                         |
| $P_1, P_2$           | Fixation probability of original and new allele if unaffected by linkage (Equation 1)                 |
| $P_{12}^*$           | Fixation probability of both mutants in absence of interference                                       |
| $P_{12}$             | Actual fixation probability of both mutants, after accounting for interference                        |
| $R$                  | Ratio of actual to non-interference double-allele fixation probability, $P_{12}/P_{12}^*$             |
| $P_{2,self}$         | Fixation probability of second allele with complete selfing (Equation 3)                              |
| $P_{2,w}$            | Emergence probability of second allele if appearing on wildtype background                            |
| $P_{HH}$             | Fixation probability of second allele with wildtype background                                        |
| $P_d$                | Fixation probability of haplotype carrying both sweeps                                                |
| $\tau$               | Time taken for first sweep to reach frequency $p$                                                     |
| $T$                  | Scaled time, $s_1 t$                                                                                  |
| $\Pi$                | Average fixation probability of second allele if it does not replace the first sweep                  |
| $\Pi_{rep}$          | Probability that second sweep replaces first if $s_2 > s_1$                                           |
| $Q_1, Q_2$           | Fixation probability of novel allele if appearing on already beneficial or neutral genetic background |
| $\Delta p$           | Change in first advantageous allele frequency over time                                               |
| $\Delta q$           | Change in second advantageous allele frequency over time (if first present)                           |
| $w_1, w_2$           | Fitness of sweeping or neutral genetic background                                                     |
| $\bar{w}$            | Population mean fitness, change in fitness following sweep                                            |
| $r$                  | Recombination rate between two loci                                                                   |
| $\theta_1, \theta_2$ | Relative selective advantage of second allele, if residing on either beneficial or neutral background |
| $\theta_3$           | Relative selective advantage of recombinant haplotype carrying both alleles                           |
| $\Delta$             | Difference in fixation probability between different backgrounds                                      |
| $\phi$               | Scaled advantage of new beneficial allele, $s_2/s_1$                                                  |
| $\rho$               | Scaled recombination rate, $r/s_1$                                                                    |
| $\lambda_1$          | Rate of selected substitution with mutation                                                           |
| $\Theta$             | Population rate of beneficial mutation in multiple sweep case, $4NU_b$                                |

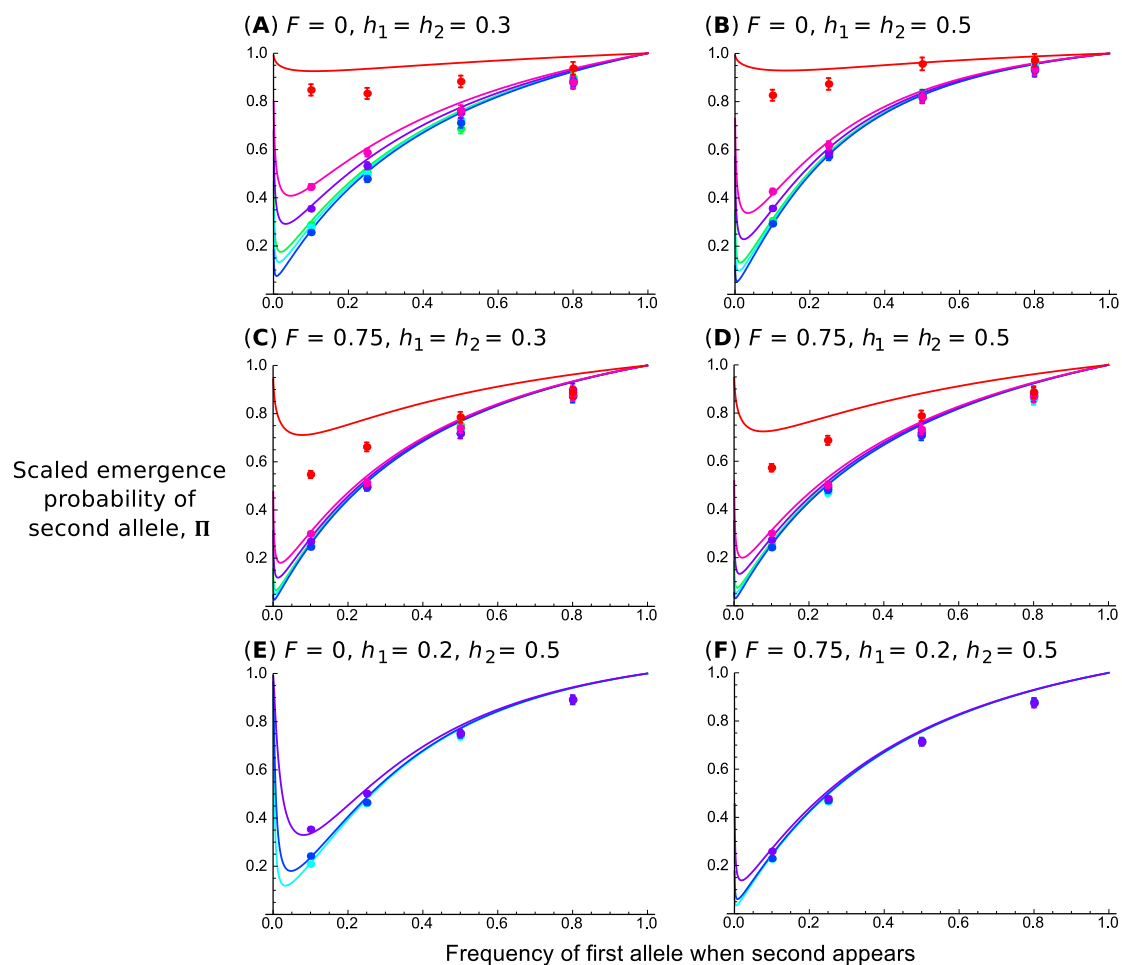

Figure 1: Probability of fixation of the second allele relative to the unlinked case,  $\Pi$ , as a function of the first allele frequency,  $p$ .  $N = 2000$ ,  $s_1 = 0.04$ ,  $s_2 = 0.02$  (so  $\theta = 0.5$ ), and from bottom to top in (a)–(d):  $4Nr = 0.4, 1, 1.6, 4, 16$ , and  $80$  (corresponding to  $\rho = 0.00125, 0.003125, 0.005, 0.0125, 0.025$ , and  $0.5$ ). In (e) and (f), from bottom to top:  $4Nr = 0.4, 1, 4$  (corresponding to  $\rho = 0.00125, 0.003125, 0.0125$ ). Parameters used are  $F = 0$ ,  $h_1 = h_2 = 0.3$  (a);  $F = 0$ ,  $h_1 = h_2 = 0.5$  (b);  $F = 0.75$ ,  $h_1 = h_2 = 0.3$  (c);  $F = 0.75$ ,  $h_1 = h_2 = 0.5$  (d);  $F = 0$ ,  $h_1 = 0.2$ ,  $h_2 = 0.5$  (e); and  $F = 0.75$ ,  $h_1 = 0.2$ ,  $h_2 = 0.5$  (f). Curves correspond to solutions provided by analytical system of differential equations, 11, rescaled so it is a function of  $p$  instead. Points corresponds to 5000 stochastic simulations for which the second beneficial allele has fixed.

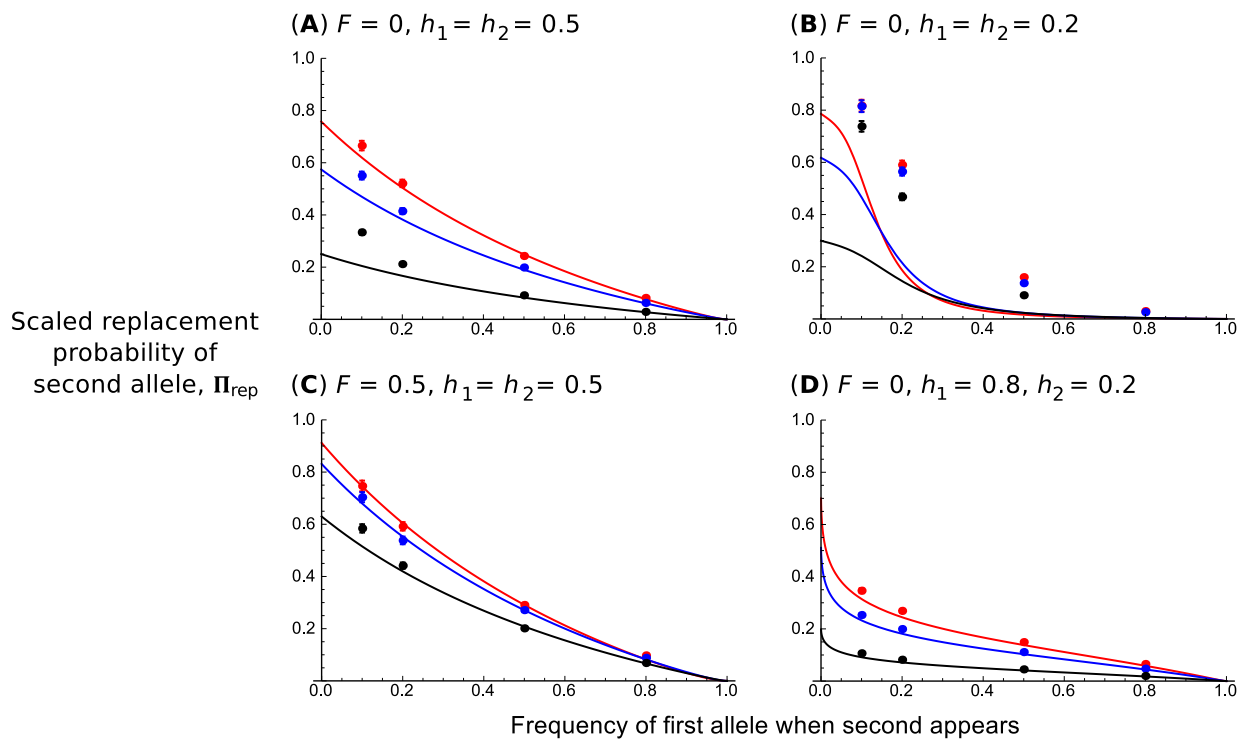

Figure 2: Probability  $\Pi_{rep}$  that a second beneficial allele with advantage  $s_2$  replaces an existing sweep with selective advantage  $s_1$  where  $s_2 > s_1$ , as a function of the first sweep frequency  $p$  when the second sweep appears.  $N = 5,000$  and  $2Nr = 0.1$  (red),  $0.2$  (blue) or  $0.5$  (black). Other parameters are (a)  $F = 0$ ,  $s_1 = 0.02$ ,  $s_2 = 0.04$  and  $h_1 = h_2 = 0.5$ ; (b)  $F = 0$ ,  $s_1 = 0.01$ ,  $s_2 = 0.04$ , and  $h_1 = h_2 = 0.2$ ; (c)  $F = 0.5$ ,  $s_1 = 0.02$ ,  $s_2 = 0.04$ , and  $h_1 = h_2 = 0.5$ ; or (d)  $F = 0$ ,  $s_1 = 0.005$ ,  $s_2 = 0.02$ ,  $h_1 = 0.8$  and  $h_2 = 0.2$ . Points corresponds to 5,000 stochastic simulations for which the second beneficial allele has fixed.

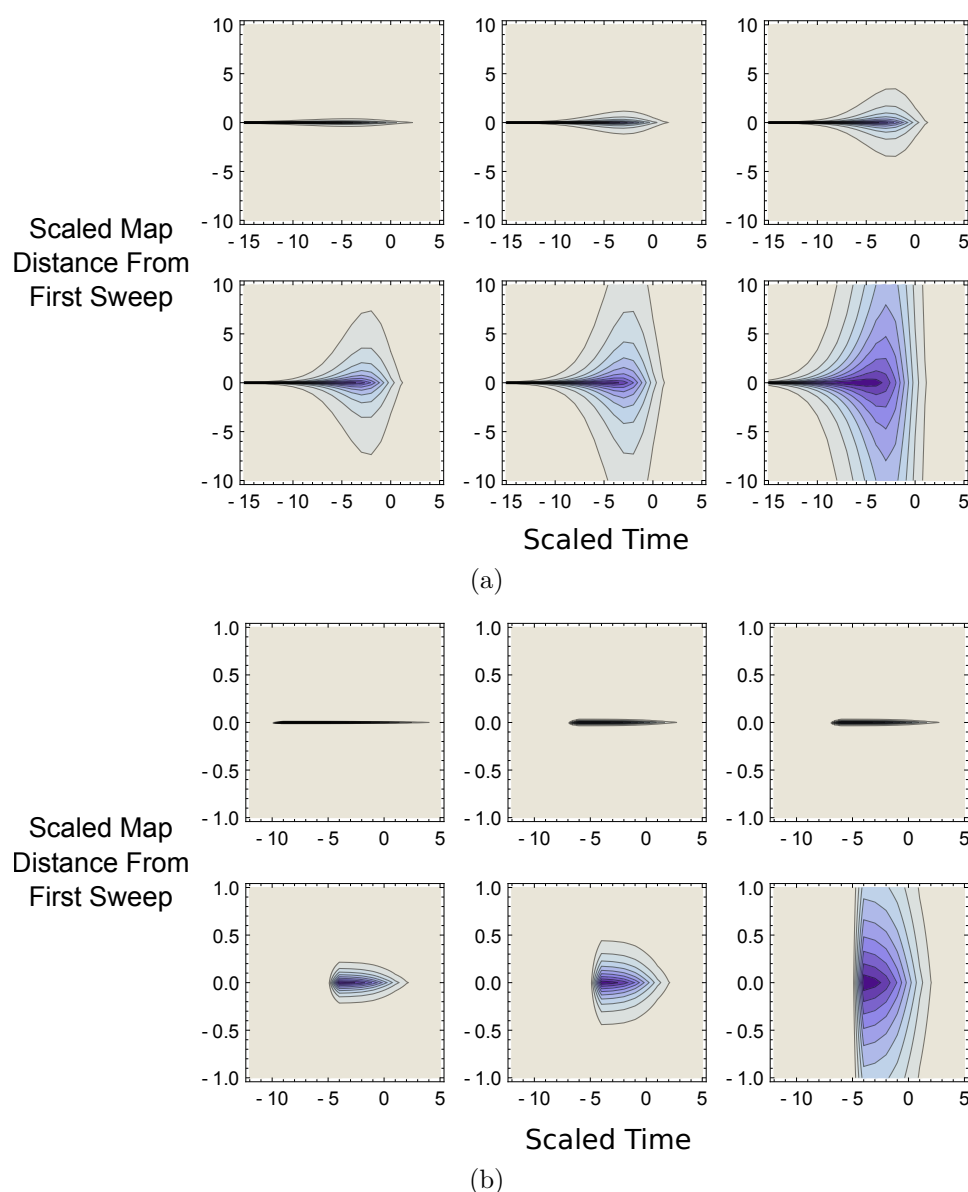

Figure 3: Contour plots showing degree of interference, as measured by Equation 2 with  $\Pi$  defined by Equation 25 (for  $\phi < 1$ ) and  $\Pi_{ref}$  defined with Equation 31 (for  $\phi > 1$ ), when both mutations are additive ( $h_1 = h_2 = 1/2$ ). In both panels, darker colours indicate higher degree of interference (with the darkest representing  $R$  approaching 0); x-axis denotes time of the sweep (with the sweep reaching 50% frequency at  $T = 0$ ); y-axis is the map distance from the first sweep (scaled to  $10^{-2}/s_1$ ). Top panels of plots are for  $F$  values of 0, 0.5, and 0.8 respectively; bottom row are  $F$  values of 0.9, 0.95, 0.99. Other parameters are  $N = 10,000$ , and (a)  $s_1 = 0.01$ ,  $s_2 = 0.005$  so  $\phi = 0.5$ ; or (b)  $s_1 = 0.01$ ,  $s_2 = 0.05$  so  $\phi = 5$ .

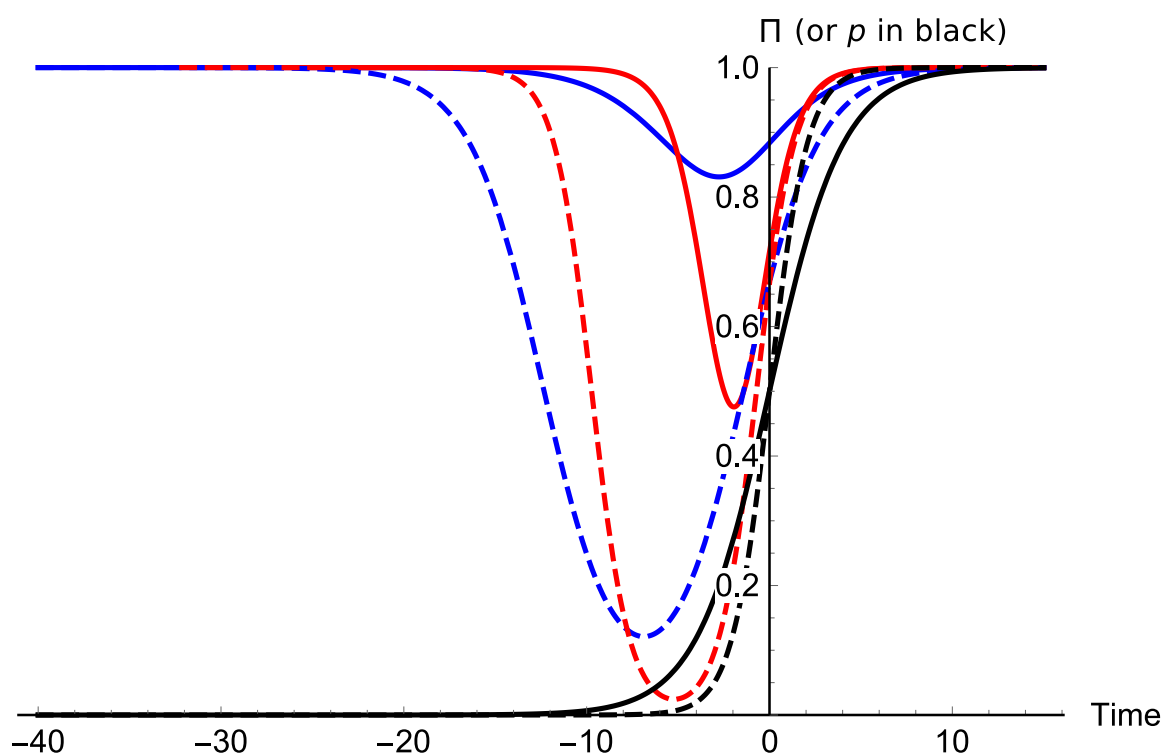

Figure 4: Profile of how  $\Pi$  changes over the course of the first sweep, as a function of time  $T$ .  $h_1 = h_2 = 0.5$ ,  $\phi = 1$  and  $\rho$  equals 0.1 (coloured solid lines) or 0.0001 (coloured dashed lines). Results are compared for  $F = 0$  (blue lines) or  $F = 0.95$  (red lines). For comparison, the underlying first sweep is also plotted, for  $F = 0$  (solid black line) or  $F = 1$  (dashed black line). Note that time is scaled so both sweeps reach a frequency of 50% at time  $T = 0$ .

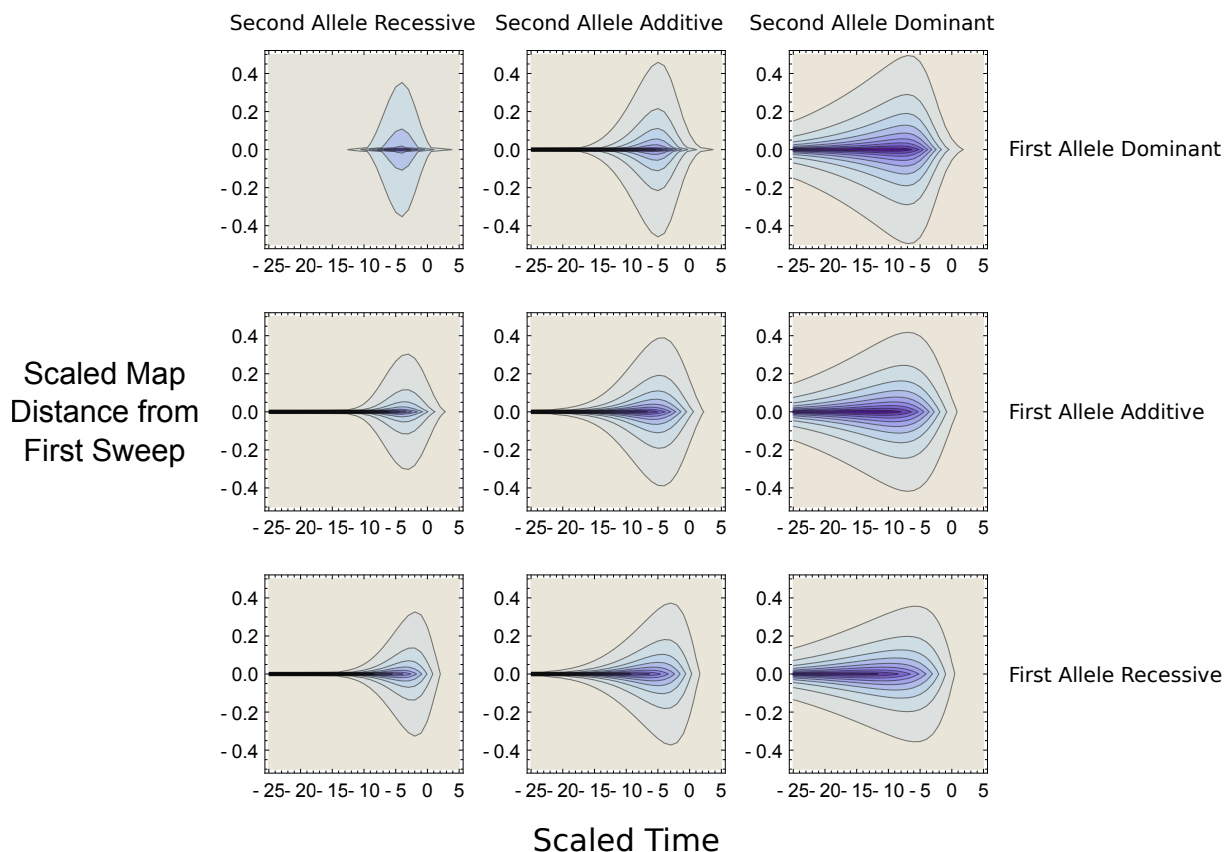

Figure 5: Contour plots showing degree of interference, as measured by Equation 2 with  $\Pi$  defined by Equation 25 and  $\Pi_{rep} = 0$  (as  $\phi < 1$ ), for different dominance values. In both panels, darker colours indicate higher degree of interference ( $R$  approaching 0); x-axis denotes time of the sweep (with the sweep reaching 50% frequency at  $T = 0$ ); y-axis is the map distance from the first sweep (scaled to  $10^{-2}/s_1$ ). Labels denote the dominance value of the first and second mutation, with recessive mutants having  $h = 0.2$ ; additive mutations  $h = 0.5$ ; dominant mutations  $h = 0.8$ . Other parameters are  $N = 10,000$ , and  $s_1 = 0.01$ ,  $s_2 = 0.005$  so  $\phi = 0.5$ .

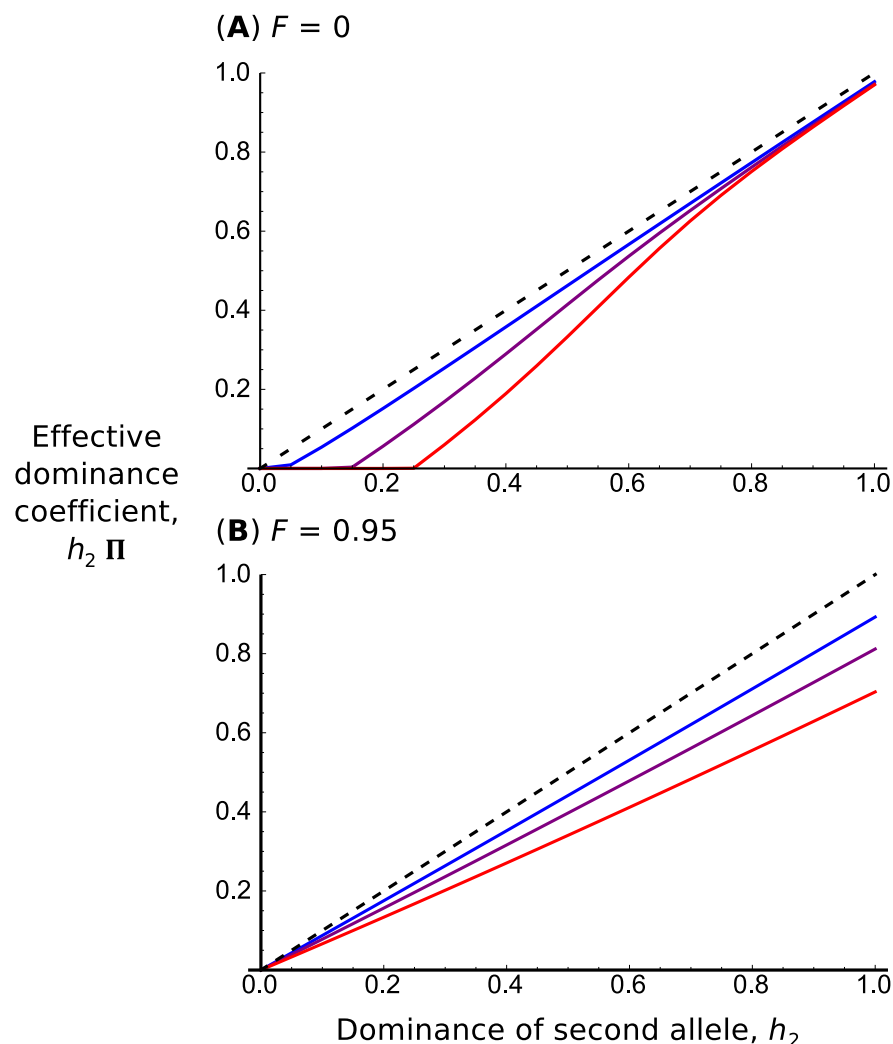

Figure 6: Plots of the effective distribution of dominance effects in either an outcrossing population ( $F = 0$ , (a)), or a selfing population ( $F = 0.95$ , (b)), defined by  $h_2 \cdot \bar{\Pi}$  (Equation 20), as a function of  $h_2$ .  $N = 10,000$ ,  $h_1 = 0.5$ ,  $s_1 = s_2 = 0.01$  ( $\phi = 1$ ),  $\theta = 4Nu = 0.1$  and  $r = 0.001$  (blue line),  $0.0001$  (purple line), or  $0.00001$  (red line). The dashed line shows the  $y = x$  line, as expected without interference.



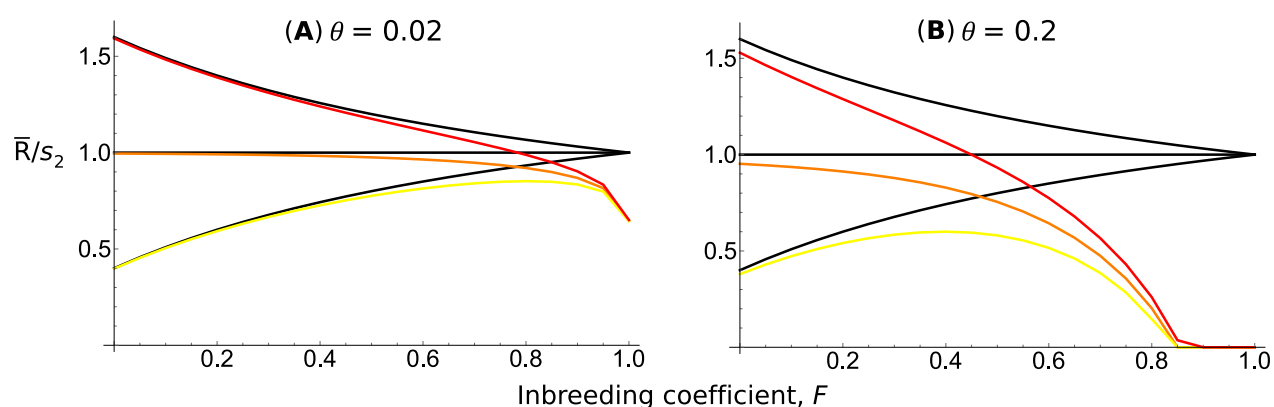

Figure 7: Plots of the total effect of interference,  $\bar{R}$ , as defined using Equation 23, as a function of  $F$ . The  $y$ -axis is the probability of emergence scaled to  $s_2$ , the expected emergence probability with  $F = 1$ . There is a continual rate of mutation  $\theta = 4Nu = 0.02$  (left) or  $0.2$  (right).  $N = 10,000$ ,  $r = 0.01$ ,  $h_1 = 0.5$ ,  $s_1 = 0.01$ ,  $s_2 = 0.001$  ( $\phi = 0.1$ ), and  $h_2 = 0.2$  (yellow line),  $0.5$  (orange line), or  $0.8$  (red). Black lines show expected fixation probability in the absence of interference.

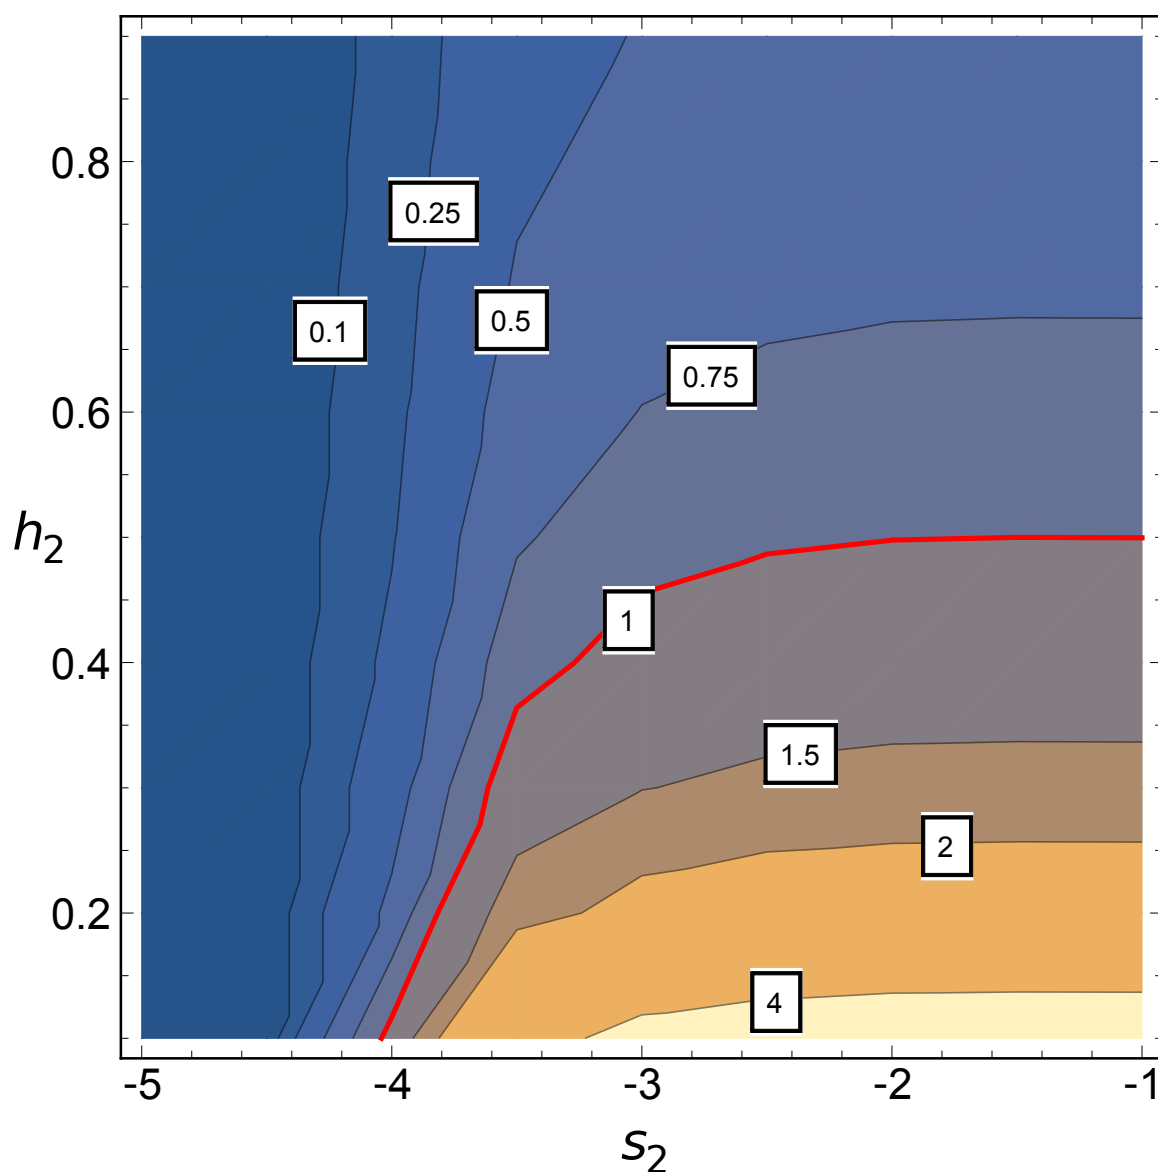

Figure 8: Contour plot of the ratio of  $\bar{R}$  (Equation 23) for  $F = 0$  and  $F = 0.95$ , as a function of  $s_2$  and  $h_2$ . Values less than one indicate that outcrossers has the higher fixation probability, and values greater than one indicate that  $F = 0.95$  populations have the higher probability. Other parameters are  $\theta = 0.1$ ,  $N = 10,000$ ,  $r = 0.01$ ,  $h_1 = 0.5$ , and  $s_1 = 0.01$ .
